# Supplementary material for: Circulatory osmotic desalination driven by a mild temperature gradient based on lower critical solution temperature (LCST) phase transition materials
Source: Royal Society of Chemistry journal article supplement (doi:10.1039/c3cp52613e), 2013-01-01
Supplement: c3cp52613e.pdf [file c3cp52613e.pdf]

## Supplementary Information for:

# Circulatory osmotic desalination by mild temperature gradient based on lower critical solution temperature (LCST) phase transition materials

Yeongbong Mok<sup>‡</sup>, Daichi Nakayama<sup>‡</sup>, Minwoo Noh, Sangmok Jang, Taeho Kim, and Yan Lee\*

Department of Chemistry, College of Natural Sciences, Seoul National University, Gwanak-ro 1, Gwanak-gu, Seoul 151-747, Republic of Korea.

<sup>‡</sup> These two authors equally contributed to this work.

### Table of contents:

**Fig. S1** Synthetic schemes of (a) *n*Bu-TAEA and (b) *n*Bu-PEI.

**Fig. S2** <sup>1</sup>H-NMR spectra of (a) *n*Bu-TAEA and (b) *n*Bu-PEI.

**Fig. S3** (a) LCST phase transition and (b) molarity-temperature phase diagrams of *n*Bu-TAEA and *n*Bu-PEI.

**Fig. S4** Osmolality of (a) *n*Bu-TAEA and (b) *n*Bu-PEI

**Fig. S5** A video file showing the circulatory desalination based on *n*Bu-TAEA.

**Fig. S1** Synthetic schemes of (a) *n*Bu-TAEA and (b) *n*Bu-PEI.

**Fig. S1a**

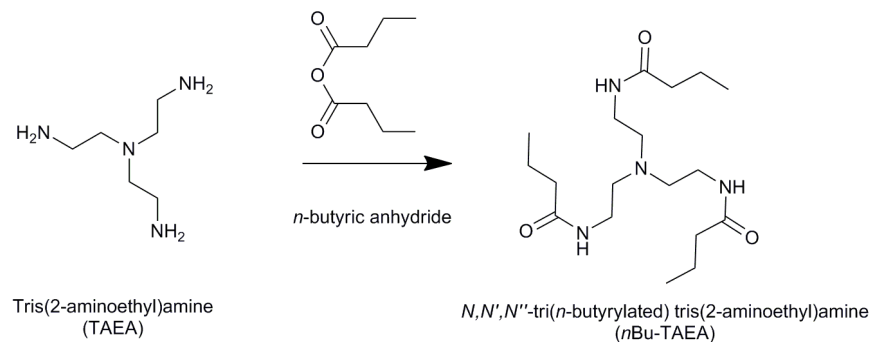

**Fig. S1b**

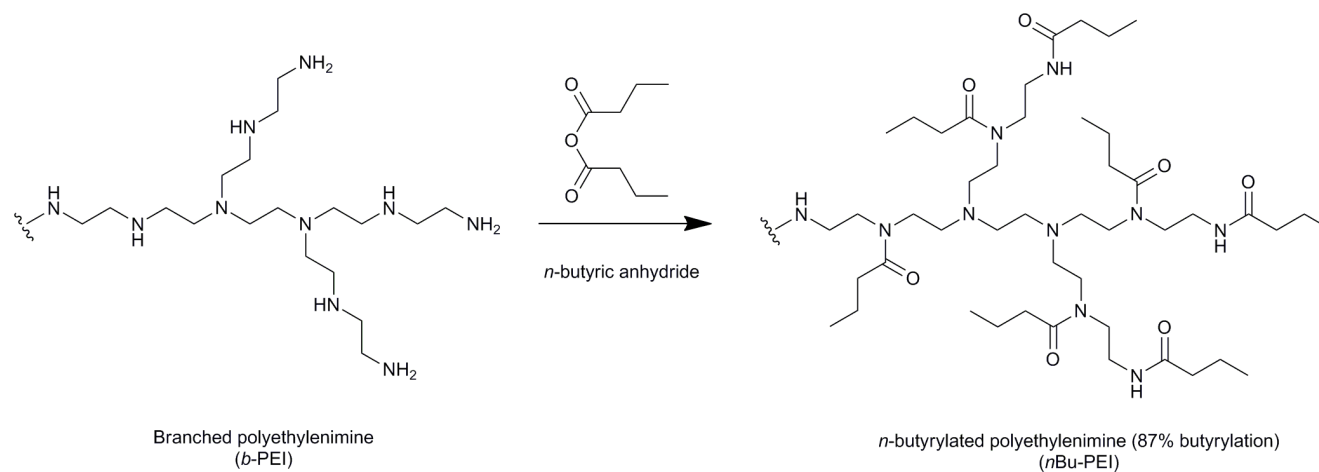

**Fig. S2**  $^1\text{H-NMR}$  spectra of (a) *n*Bu-TAEA and (b) *n*Bu-PEI in  $\text{CD}_3\text{OD}$ .

**Fig. S2a**

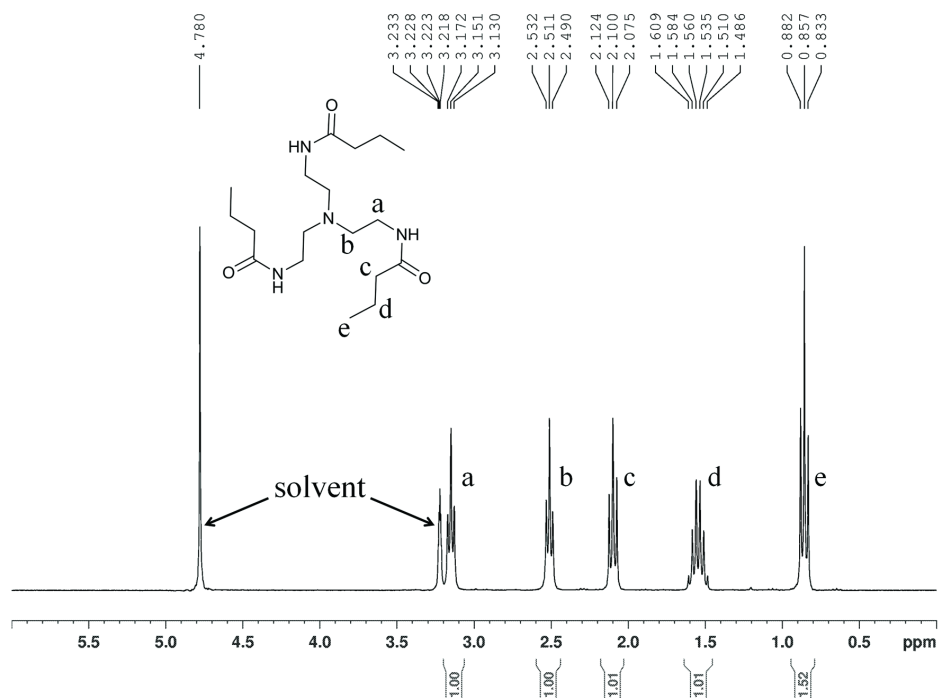

**Fig. S2b**

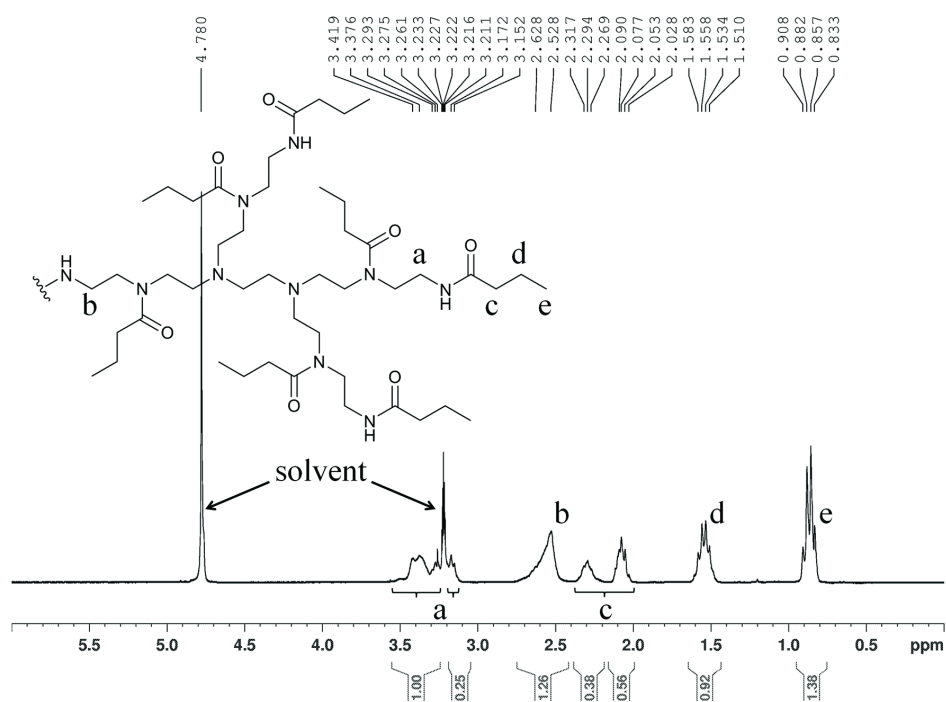

**Fig. S3a** LCST phase transition of *n*Bu-TAEA and *n*Bu-PEI.<sup>a</sup>

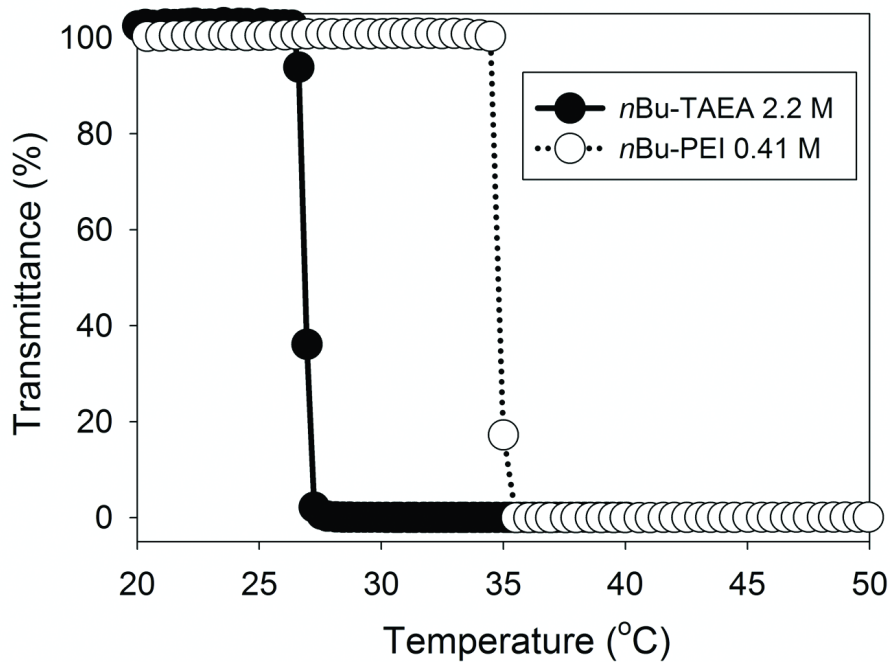

**Fig. S3b** Molarity-temperature phase diagrams of *n*Bu-TAEA and *n*Bu-PEI.<sup>a</sup>

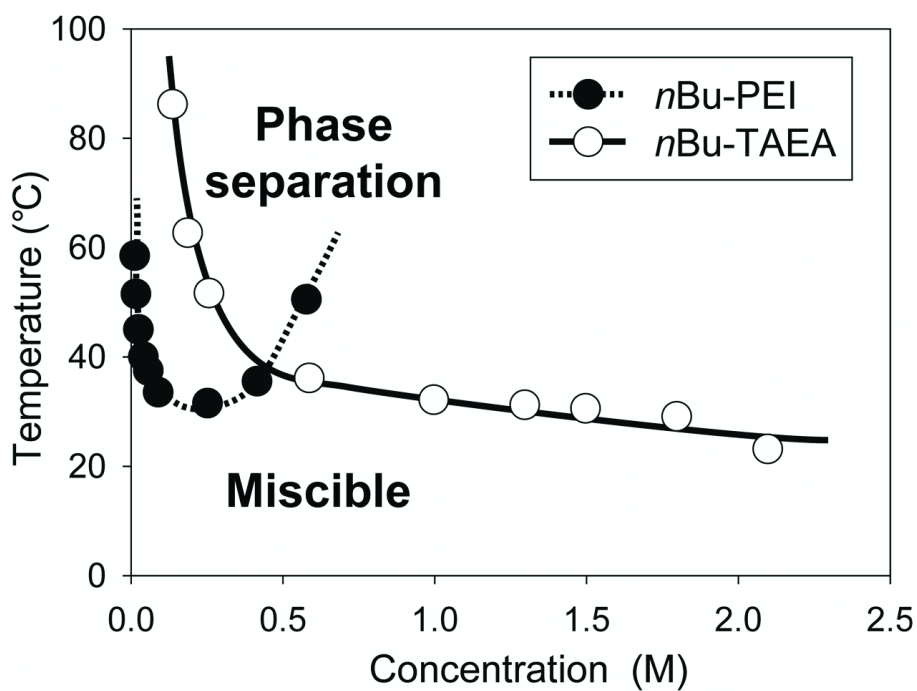

<sup>a</sup>The molarity was calculated based on the density at 25°C.

**Fig. S4a** Osmolality of *n*Bu-TAEA

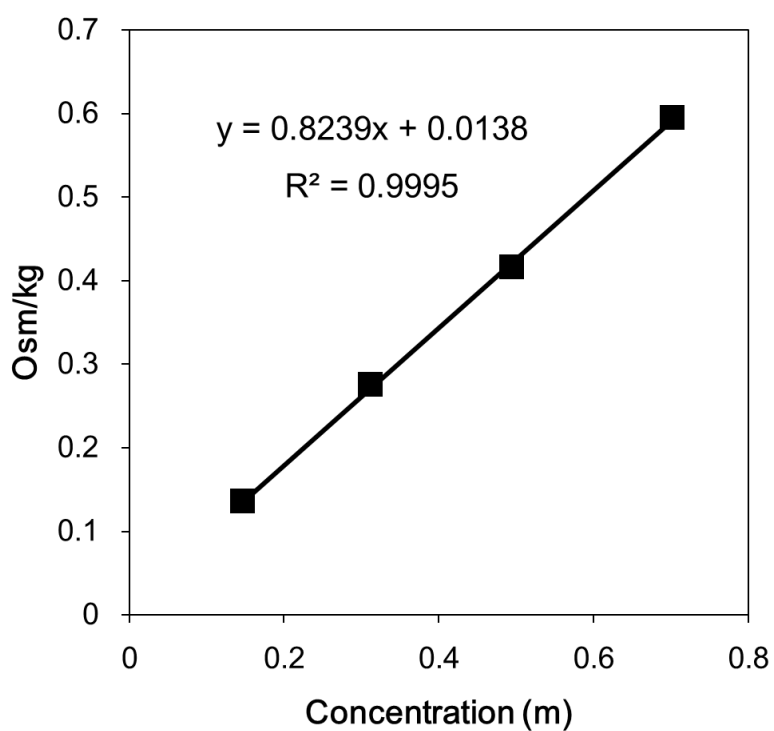

**Fig. S4b** Osmolality of *n*Bu-PEI

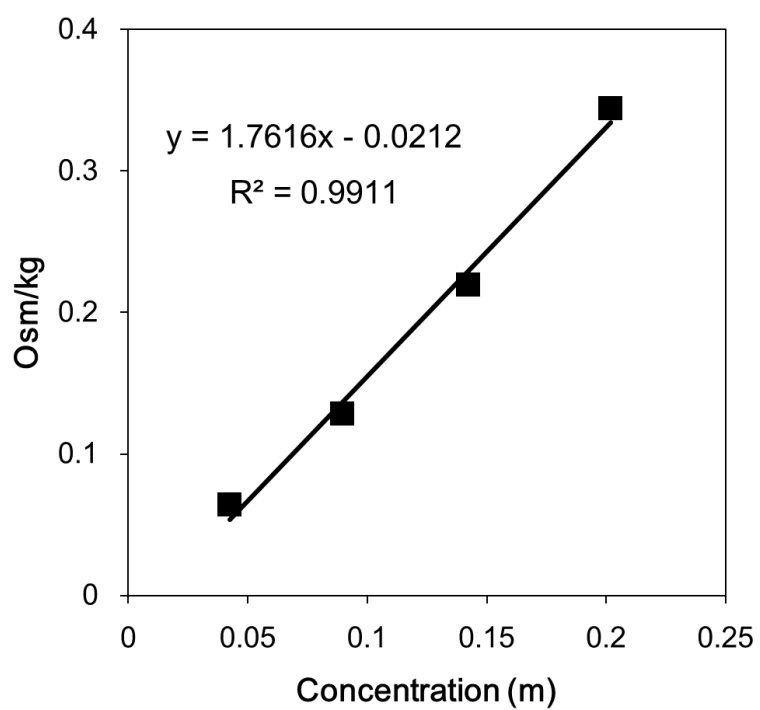

**Fig. S5** A video file showing the circulatory desalination based on *n*Bu-TAEA. (File format: .WMV) The video recorded during 13 hours was compressed in 7.6 seconds.
